# Supplementary material for: How to improve mRNA-based CAR-T cell generation and functionality? A lab-scale comparison
Source: Research Square preprint supplement (doi:10.21203/rs.3.rs-2719850/v1), 2023-04-05
Supplement: Supplementary file 1 [file cdb51c3931594a104a491720.docx]

How to improve mRNA-based CAR-T cell generation and functionality? A lab-scale comparison

Nadine von Auw1, Robert Serfling1, Reni Kitte1, Nadja Hilger1, Chengkang Zhang2, Stephan Fricke1,3,U. Sandy Tretbar1,3*

1Fraunhofer Institute for Cell Therapy and Immunology (IZI), Department for Cell and Gene Therapy Development, Perlickstr. 1, 04103 Leipzig, Germany

2Lonza, 9900 Medical Center Drive, Rockville, MD 20850, USA

3Fraunhofer Cluster of Excellence Immune-Mediated Diseases CIMD, Leipzig, Germany

*corresponding author

**Supplemental Information**

**Supplemental Figures:**


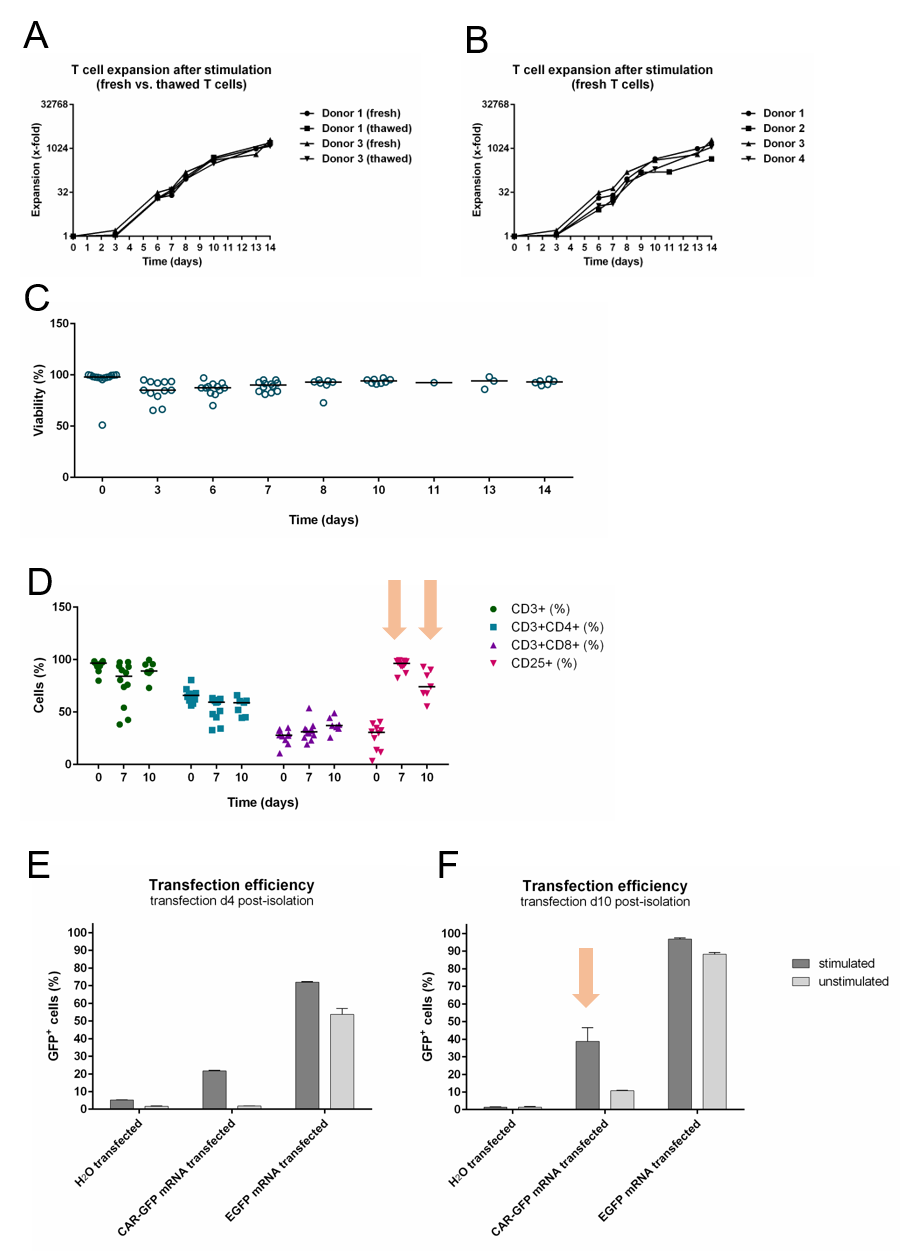


**Figure S1. Days six to ten after T cell stimulation are the most suitable days for T cell transfection with mRNA.** (A) The expansion of T cells from two healthy donors was compared when cultured directly after isolation or expanded after thawing from frozen culture. (B) Primary T cells of four healthy donors were cultured according to protocol A and monitored for cell expansion over 14 days. (C/D) 14 different T cell cultures were checked for viability, T cell subtypes, and activation and available data points were plotted. (E/F) The transfection efficiency of CAR-GFP-mRNA electroporated T cells was determined at day four (E) and day ten (F) post-isolation. H2O-transfected T cells served as negative control, and EGFP-mRNA transfected T cells as a positive control. Values are displayed as one biological experiment with two replicates (n =1).


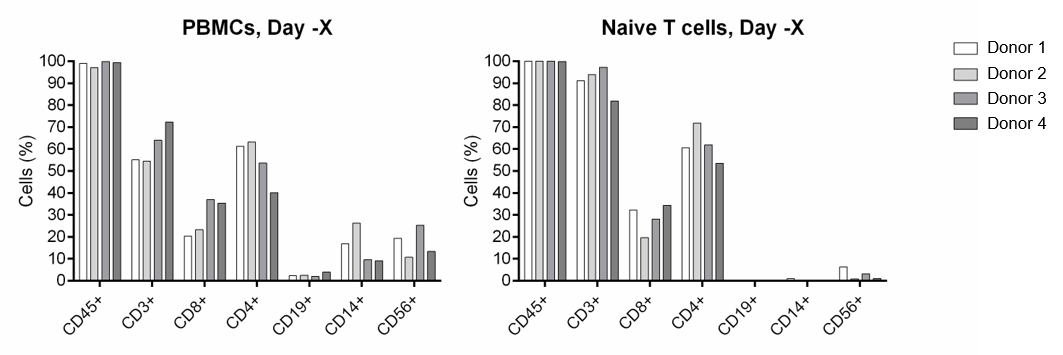


**Figure S2: Quality control of T cell isolation.** Since the frequency of lymphocytes varies across individuals, the quality of T cell separation was assessed on the day of isolation (day -X) by an immune cell phenotyping using flow cytometry. After the Ficoll gradient, immune phenotyping of the obtained peripheral blood mononuclear cells (PBMCs, day -X) showed an adequate composition of 70-85 % T cells (CD3+), 5-10 % B cells (CD19+), 5-10 % monocytes (CD14+), and 5-30 % NK cells (CD56+). CD3+ T cells were composed of CD4+ and CD8+ cells, roughly in a 2:1 ratio. After T cell isolation, naïve T cells were analyzed using the same antibody panel for immune phenotyping, indicating high purity of the T cell population by CD3+/CD4+/CD8+ cells. References for cell numbers: Kleiveland 2015; Miltenyi Biotec.


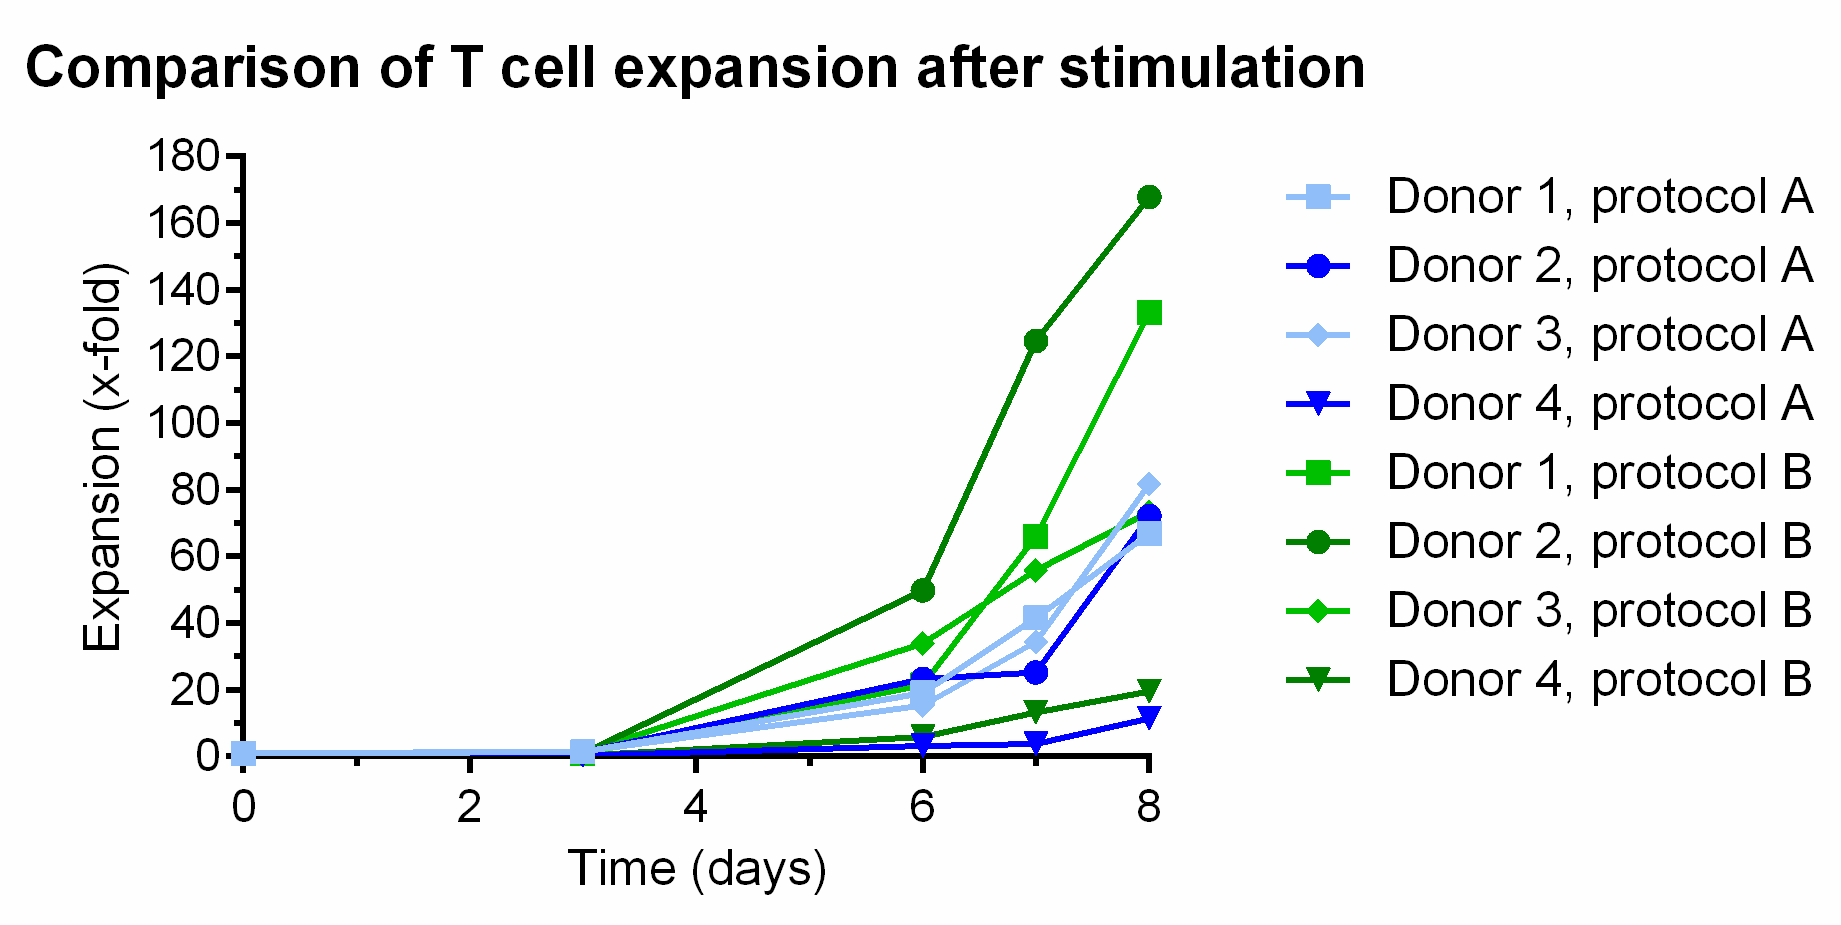


**Figure S3: T cell expansion rates of four individual donors in two different media.** Primary T cells of four healthy donors were monitored for cell expansion over eight days. Cells were either cultured according to protocol A (blue) or protocol B (green). T cells were cultured at 37 °C and 37 % CO2 for up to eight days. Values are displayed as one biological experiment (n =1).





**Figure S4: Electroporation of primary T cells with EGFP-mRNA using different electroporation parameters (pulse codes).** Freshly prepared T cells were stimulated and cultured according to protocol A up to seven days before electroporation with commercially available EGFP-mRNA (TriLink). A total of nine different pulse codes were tested. The transfection efficiency (percentage of EGFP-positive cells (GFP+)) and viability (percentage of 7-AAD-negative cells (7-AAD-)) were measured via flow cytometry 24 h (A) and 48 h (B) after transfection. Untransfected cells mixed with mRNA were used as control (NPC). Data represent the means (±SEM) of two replicates from one donor, each measured as technical duplicates.

*
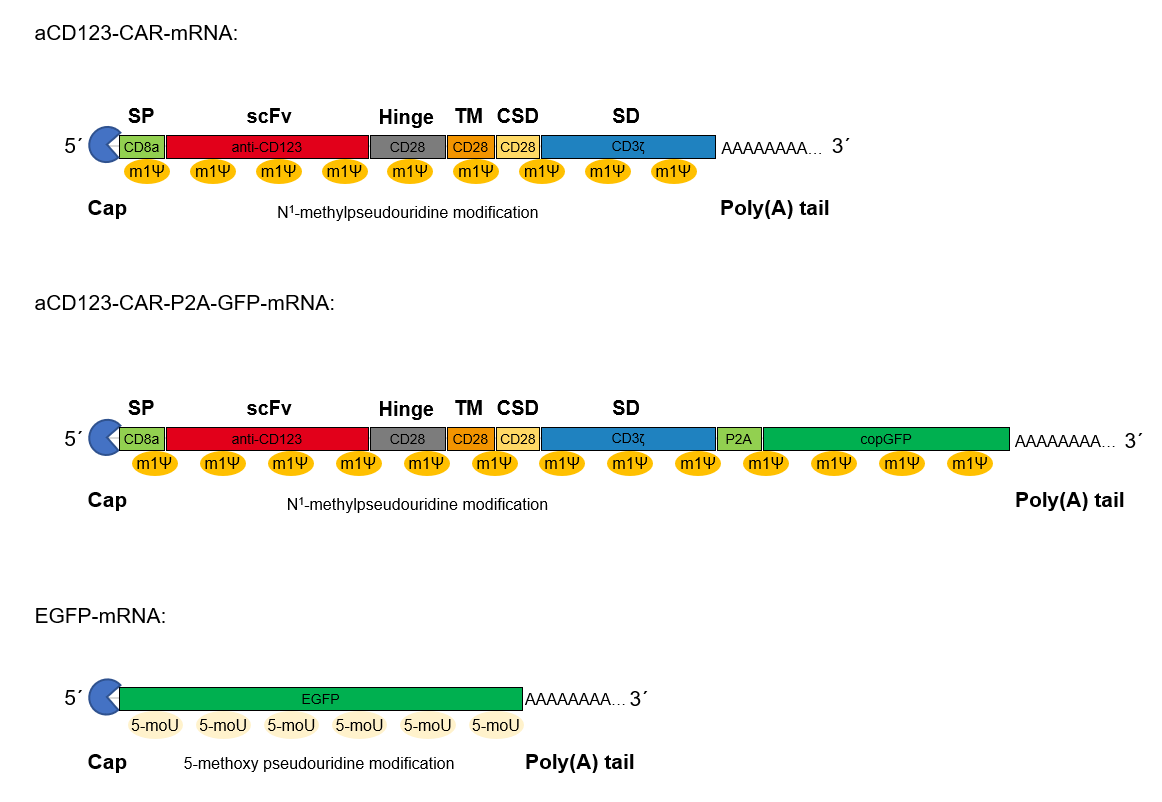
*

**Figure S5:** **Schematic of the mRNA constructs used in this study.** For transient transfection, an anti-CD123-CAR-mRNA and a reporter EGFP mRNA were used. Both were capped, poly(A)-tailed, and modified with pseudouridine variants instead of uridine 5’-triphosphate (UTP). The CAR-encoding sequence consists of signal peptide (SP), CD123-directed single chain variable fragment (scFv), CD28 hinge, CD28 transmembrane domain (TM), CD28 co-stimulatory domain (CSD), and a CD3ζ signaling domain (SD). The reporter EGFP mRNA was only used for pulse code testing for optimal electroporation setting determination.





**Figure S6: Electroporation of primary T cells with aCD123-CAR-P2A-GFP model mRNA using three pre-selected pulse codes.** Freshly prepared T cells were stimulated and cultured for up to 10 days before electroporation with CAR-mRNA. Untransfected cells mixed with mRNA were used as control (NPC). Data represent the means (±SEM) of two replicates from one donor, each measured as technical duplicates. The transfection efficiency (percentage of EGFP-positive cells (GFP+)) and CAR expression was measured via flow cytometry 24 h (A) and 48 h (B) after transfection. (C) The viability was determined 24 h after transfection as a percentage of 7-AAD-negative (7-AAD-) cells.

**References:**

Kleiveland, Charlotte R. (2015): The Impact of Food Bioactives on Health: in vitro and ex vivo models. Peripheral Blood Mononuclear Cells. Hg. v. Kitty Verhoeckx, Paul Cotter, Iván López-Expósito, Charlotte Kleiveland, Tor Lea, Alan Mackie, et al. Cham (CH).

Miltenyi Biotec: Blood. Subtypes of PBMCs. Online verfügbar unter https://www.miltenyibiotec.com/DE-en/resources/macs-handbook/human-cells-and-organs/human-cell-sources/blood-human.html#gref.
